# Supplementary material for: Binary composites of (m-t) BiVO 4 /g-C 3 N 4 as an efficient S-scheme photocatalyst for bromocresol green degradation under visible light
Source: Research Square preprint supplement (doi:10.21203/rs.3.rs-7580004/v1), 2025-09-24
Supplement: Supplementary file 1 [file 636bcd8f4ac75bf05b43fec1.docx]

**Binary composites of** **(m-t) BiVO4/g-C3N4 as an efficient S-scheme photocatalyst for bromocresol green degradation under visible light**

Pooja Mohana, Srinivas Mallapura*, Prathibha C Pa, Rajesh B Mb, Sakthivel Kandaiaha, S. Girish Kumarc*

aDepartment of Chemistry and Centre for Nano and Functional M**a**terials, REVA University, Kattigenahalli, Yelahanka, Bengaluru-560064, India

bDepartment of Physics, R V College of Engineering, Bengaluru-560059, India

cDepartment of Chemistry and Centre for Nanomaterials and Devices, RV College of Engineering, Bengaluru-560059, India

[srinivas.m@reva.edu.in](mailto:srinivas.m@reva.edu.in) and [girichem@yahoo.co.in](mailto:girichem@yahoo.co.in)

**Table S1.** Flat band potential and band positions calculation of the prepared catalysts.

| **Catalysts** | **V *v/s* Ag/AgCl** | | | | **V *v/s* RHE** | |
| --- | --- | --- | --- | --- | --- | --- |
|  | **Eg** | **EFB** | **ECB** | **EVB** | **ECB** | **EVB** |
| BiVO4 | 2.32 | -0.316 | -0.416 | 1.684 | 0.194 | 2.514 |
| g-C3N4 | 2.88 | -0.903 | -1.003 | 1.877 | -0.393 | 2.487 |
| BVG-1 | 1.87 | -0.297 | -0.397 | 1.473 | 0.213 | 2.083 |
| BVG-3 | 2.02 | 0.284 | 0.184 | 2.204 | 0.794 | 2.814 |
| BVG-6 | 2.07 | -0.05 | -0.15 | 1.92 | 0.46 | 2.53 |

**S1. Catalyst characterization.**

All the photocatalysts were characterized by the following techniques: Powder X-ray Diffraction using a Bruker D8-Advance (PXRD) with Cu K as the source and accelerating voltage and current of 40 kV and 40 mA, respectively. UV-visible diffuse reflectance (UV-Vis DRS) spectra, A SPECORD 210 Plus spectrometer (Analytik Jena, Germany) was used to record UV-visible diffusion reflectance spectra (UV-7 Vis-DRS) in the wavelength range of 200 to 800 nm. Fourier Transform Infra-Red (FTIR), We employed KBr pellets and a Perkin-Elmer spectrophotometer to record FTIR with a resolution of 4 cm-1 in transition mode at room temperature. Scanning Electron Microscope (SEM) equipped with Energy X-ray Dispersive (EDX), Zeiss Neon 40EsB FIBSEM SEM was used to analyse the materials morphology and equip it with EDS. Photoluminescence (PL) Spectroscopy, The UV-Vis spectral range of the Varian Cary Eclipse Fluorescence Spectrophotometer was used for recording photoluminescence. High resolution transmission electron microscope (HRTEM) and X-ray photoelectron microscope (XPS) confirmed the BiVO4, g-C3N4 and BiVO4/g-C3N4. composite photocatalysts.

**S2. Electrochemical analysis**

A standard three-electrode system was used to analyze photoelectrochemical measurements of the prepared photocatalysts. The working electrode was an FTO substrate (sample dispersed in water and coated onto the FTO plate), the counter electrode was a platinum wire, and the electrolyte was 0.5 M Na2SO4 solution (pH 7) with Ag/AgCl in saturated KCl as the reference electrode in the electrochemical cell. The 300 W Xe lamp and intensity 100 W/cm2 were utilized as the light source on the FTO to provide illumination from the back side. The EIS studies were conducted in a dark environment, after a 10 min delay, in the frequency of 10 kHz with an amplitude of 10 mV in applied voltage of +0.2 V Ag/AgCl. Experiments using LSV and transient photocurrent were conducted in both light and dark conditions.

**S3.** **Photochemical Reactor.**

A 300 mL quartz glass gas reactor filled with 250 mL of 10 ppm BCG solution was illuminated by a visible light lamp. The short arc lamps with safety resistors are used for medium and high pressure with the lamp controller with pulsator ignitor switch and electronic ballast transformer and then two pins for 450 W with a visible lamp. Prior to irradiation, the 100 mg of the photocatalysts were dispersed in the aqueous suspension and the reaction mixture was stirred for 30 min to attain the adsorption/desorption equilibrium process. After the illumination, a 5 mL aliquot of solution was drawn from the reactor every 15 min and filtered through filter paper to separate the catalyst particles. The BCG content in the solution was quantified by measuring the absorbance *vs* wavelength (200-800 nm) using UV-visible absorption spectroscopy.
